# Supplementary material for: Calibrating the sqHIMMELI v1.0 wetland methane emission model with hierarchical modeling and adaptive MCMC
Source: Copernicus journal article supplement (doi:10.5194/gmd-11-1199-2018), 2018-03-29
Supplement: Supplementary file 1 [file gmd-11-1199-2018-supplement.zip]

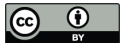

## *Supplement of*

# **Calibrating the sqHIMMELI v1.0 wetland methane emission model with hierarchical modeling and adaptive MCMC**

**Jouni Susiluoto et al.**

*Correspondence to:* Jouni Susiluoto ([jouni.susiluoto@fmi.fi](mailto:jouni.susiluoto@fmi.fi))

- [gmd-11-1199-2018-supplement-title-page.pdf](#)
- sqHIMMELI\_v1.0
  - License\_BSD2.txt
  - Makefile
  - README
  - build
  - mcmc.nml
  - methane\_geometry.f90
  - methane\_main.f90
  - methane\_output.f90
  - methane\_parameters.f90

The copyright of individual parts of the supplement might differ from the CC BY 3.0 License.
